# Supplementary material
Source: PubMed Central journal article supplement (PMC8319820)
Supplement: jamapsychiatry-e211983-s001.pdf [file jamapsychiatry-e211983-s001.pdf]

## Supplemental Online Content

Shim RS, Tully LM, Yu G, Monterozza EC, Blendermann M. Race and ethnicity of editorial board members and editors as an indicator of structural racism in psychiatry and neuroscience journals. *JAMA Psychiatry*. Published online July 28, 2021. doi:10.1001/jamapsychiatry.2021.1983

### eMethods

This supplemental material has been provided by the authors to give readers additional information about their work.

## **eMethods**

### *Identification of Journals*

Journals in psychiatry and neuroscience were identified in Winter 2019 using [SCImago](#), a publicly available database that includes journal rankings and country scientific indicators developed from the information contained in the Scopus® database (Elsevier B.V.). First, we identified journals in the United States using subject areas filters “Medicine” and “Neuroscience”, regions/countries filter “United States”, and the following subject categories filters: psychiatry and mental health, biological psychiatry, psychiatric mental health, cognitive neuroscience, behavioral neuroscience, cellular and molecular neuroscience, developmental neuroscience and neuroscience (miscellaneous). Second, we identified international journals using subject areas filters “Medicine” and “Neuroscience”, regions/countries filter “United States”, and the following subject categories filters: psychiatry and mental health, biological psychiatry, psychiatric mental health, cognitive neuroscience, behavioral neuroscience, cellular and molecular neuroscience, developmental neuroscience and neuroscience (miscellaneous). The resulting list of journals was then screened based on the description provided on SCImago; any journals not in the psychiatry, mental health, or neuroscience topic areas were screened out. If descriptions were unclear, we consulted the journal’s website. International journals with impact factors less than 5 were excluded. Editors-in-chief were identified via the journal’s home website. In the case of multiple Editor’s-in-chief, all identified individuals were included in the survey mailing list. A total of 172 Editors-in-Chief at 151 journals were identified (see list below).

### *Survey Distribution*

The survey was sent to the 172 identified Editors-in-Chief and distributed to a variety of email listservs associated with psychiatric and neuroscience research organizations. See below for a list of the email listservs and estimated number of members per organization. To protect respondent identity, the Qualtrics survey was designed to collect anonymous responses, thus preventing analysis of the proportion of respondents from each recruitment source. Multiple responses from the same IP address were prevented using the “prevent multiple responses” setting in Qualtrics survey setup. Data cleaning procedures also included examination of IP addresses, response start/end times, and response patterns. To the best of our ability, data reflect responses from unique individuals.

## List of Psychiatry & Neuroscience Journals included in survey mailing

| <b>Journals</b>                                                         | <b>SCImago Subject Category</b>     |
|-------------------------------------------------------------------------|-------------------------------------|
| Academic Psychiatry                                                     | Psychiatry and Mental Health        |
| ACS Chemical Neuroscience                                               | Cognitive Neuroscience              |
| Acta neuropathologica                                                   | Cellular and Molecular Neuroscience |
| Acta neuropathologica Communications                                    | Cellular and Molecular Neuroscience |
| Acupuncture and Electro-Therapeutics Research                           | Neuroscience (miscellaneous)        |
| Advances in Neurobiology                                                | Cellular and Molecular Neuroscience |
| AIMS Neuroscience                                                       | Neuroscience (miscellaneous)        |
| AJOB Neuroscience                                                       | Neuroscience (miscellaneous)        |
| Alzheimer's and Dementia                                                | Psychiatry and Mental Health        |
| Alzheimer's and Dementia: Diagnosis, Assessment and Disease Monitoring  | Psychiatry and Mental Health        |
| American Journal of Medical Genetics, Part B, Neuropsychiatric Genetics | Psychiatry and Mental Health        |
| American Journal of Alzheimer's Disease and other Dementias             | Psychiatry and Mental Health        |
| American Journal of Geriatric Psychiatry                                | Psychiatry and Mental Health        |
| American Journal of Orthopsychiatry                                     | Psychiatry and Mental Health        |
| American Journal of Psychiatry                                          | Psychiatry and Mental Health        |
| American Journal on Addictions                                          | Psychiatry and Mental Health        |
| Annals of Clinical Psychiatry                                           | Psychiatry and Mental Health        |
| Annals of the New York Academy of Sciences                              | Neuroscience (miscellaneous)        |
| Annual Review of Neuroscience                                           | Neuroscience (miscellaneous)        |
| Autism Research                                                         | Neuroscience (miscellaneous)        |
| Behavioral Sleep Medicine                                               | Neuroscience (miscellaneous)        |
| Biological Psychiatry                                                   | Biological Psychiatry               |
| Biological Psychiatry: Cognitive Neuroscience and neuroimaging          | Biological Psychiatry               |
| Brain and Cognition                                                     | Cognitive Neuroscience              |
| Brain and Language                                                      | Cognitive Neuroscience              |
| Brain Connectivity                                                      | Neuroscience (miscellaneous)        |
| Brain Imaging and Behavior                                              | Cognitive Neuroscience              |
| Brain Pathology                                                         | Neuroscience (miscellaneous)        |
| Brain Stimulation                                                       | Neuroscience (miscellaneous)        |
| Brain, Behavior, and Immunity                                           | Behavioral Neuroscience             |
| British Journal of Developmental Psychology                             | Developmental Neuroscience          |
| British Journal of Psychiatry                                           | Psychiatry and Mental Health        |
| Cellular and Molecular Life Sciences                                    | Cellular and Molecular Neuroscience |
| Cellular and Molecular Neurobiology                                     | Cellular and Molecular Neuroscience |
| Cerebral Cortex                                                         | Cognitive Neuroscience              |
| Chemosensory Perception                                                 | Cellular and Molecular Neuroscience |
| Child Psychiatry and Human Development                                  | Psychiatry and Mental Health        |
| Clinical and Translational Science                                      | Neuroscience (miscellaneous)        |
| Clinical Schizophrenia and Related Psychoses                            | Psychiatry and Mental Health        |

**List of Psychiatry & Neuroscience Journals included in survey mailing (continued)**

| <b>Journals</b>                                                    | <b>SCImago Subject Category</b>     |
|--------------------------------------------------------------------|-------------------------------------|
| Cognitive and Behavioral Neurology                                 | Psychiatry and Mental Health        |
| Cognitive Science                                                  | Cognitive Neuroscience              |
| Cognitive, Affective and Behavioral Neuroscience                   | Cognitive Neuroscience              |
| Current Neurology and Neuroscience Reports                         | Neuroscience (miscellaneous)        |
| Current Opinion in Neurobiology                                    | Neuroscience (miscellaneous)        |
| Current Opinion in Psychiatry                                      | Psychiatry and Mental Health        |
| Current Protocols in Neuroscience                                  | Neuroscience (miscellaneous)        |
| Current Psychiatry Reports                                         | Psychiatry and Mental Health        |
| Depression and Anxiety                                             | Psychiatry and Mental Health        |
| Developmental Neurobiology                                         | Cellular and Molecular Neuroscience |
| Developmental Psychobiology                                        | Developmental Neuroscience          |
| eLife                                                              | Neuroscience (miscellaneous)        |
| EMBO Journal                                                       | Neuroscience (miscellaneous)        |
| eNeuro                                                             | Neuroscience (miscellaneous)        |
| Experimental Neurology                                             | Developmental Neuroscience          |
| Experimental Eye Research                                          | Cellular and Molecular Neuroscience |
| Focus on Autism and Other Developmental Disabilities               | Psychiatry and Mental Health        |
| GLIA                                                               | Cellular and Molecular Neuroscience |
| Harvard Review in Psychiatry                                       | Psychiatry and Mental Health        |
| Hippocampus                                                        | Cognitive Neuroscience              |
| IEEE Transactions on Neural Systems and Rehabilitation Engineering | Neuroscience (miscellaneous)        |
| International Journal of Behavioral Development                    | Developmental Neuroscience          |
| International Journal of Integrative Biology                       | Neuroscience (miscellaneous)        |
| International Journal of Methods in Psychiatric Research           | Psychiatry and Mental Health        |
| International Review of Neurobiology                               | Cellular and Molecular Neuroscience |
| International Review of Psychiatry                                 | Psychiatry and Mental Health        |
| Investigative Ophthalmology and Visual Science                     | Cellular and Molecular Neuroscience |
| JAMA Psychiatry                                                    | Psychiatry and Mental Health        |
| Journal of Addictions Nursing                                      | Psychiatry and Mental Health        |
| Journal of Child and Adolescent Psychiatric Nursing                | Psychiatry and Mental Health        |
| Journal of Child Psychology and Psychiatry and Allied Disciplines  | Psychiatry and Mental Health        |
| Journal of Clinical Psychiatry                                     | Psychiatry and Mental Health        |
| Journal of Cognitive Neuroscience                                  | Cognitive Neuroscience              |
| The Journal of ECT                                                 | Psychiatry and Mental Health        |
| Journal of EMDR Practice and Research                              | Psychiatry and Mental Health        |
| Journal of Emotional and Behavioral Disorders                      | Psychiatry and Mental Health        |
| Journal of Experimental Psychology: General                        | Developmental Neuroscience          |
| Journal of Experimental Stroke and Translational Medicine          | Cognitive Neuroscience              |
| Journal of Geriatric Psychiatry and Neurology                      | Psychiatry and Mental Health        |
| Journal of Individual Differences                                  | Biological Psychiatry               |
| Journal of Loss and Trauma                                         | Psychiatry and Mental Health        |
| Journal of Molecular Neuroscience                                  | Cellular and Molecular Neuroscience |
| Journal of Motor Behavior                                          | Cognitive Neuroscience              |
| Journal of Neurology, Neurosurgery and Psychiatry                  | Psychiatry and Mental Health        |

**List of Psychiatry & Neuroscience Journals included in survey mailing (continued)**

| <b>Journals</b>                                                    | <b>SCImago Subject Category</b>     |
|--------------------------------------------------------------------|-------------------------------------|
| Journal of Neurophysiology                                         | Neuroscience (miscellaneous)        |
| Journal of Neuropsychology                                         | Cognitive Neuroscience              |
| Journal of Neuroscience                                            | Neuroscience (miscellaneous)        |
| Journal of Neuroscience Research                                   | Cellular and Molecular Neuroscience |
| Journal of Neuroscience, Psychology, and Economics                 | Cognitive Neuroscience              |
| Journal of Psychiatric Practice                                    | Psychiatry and Mental Health        |
| Journal of Psychiatry and Neuroscience                             | Psychiatry and Mental Health        |
| Journal of Psychophysiology                                        | Neuroscience (miscellaneous)        |
| Journal of Psychosocial Nursing and Mental Health Services         | Psychiatry and Mental Health        |
| Journal of the American Academy of Child and Adolescent Psychiatry | Psychiatry and Mental Health        |
| Journal of the American Academy of Psychiatry and the Law          | Psychiatry and Mental Health        |
| Journal of the American Psychiatric Nurses Association             | Psychiatry and Mental Health        |
| Journal of Visualized Experiments                                  | Neuroscience (miscellaneous)        |
| Language, Cognition and Neuroscience                               | Cognitive Neuroscience              |
| Learning and Behavior                                              | Cognitive Neuroscience              |
| Learning and Memory                                                | Cognitive Neuroscience              |
| LGBT Health                                                        | Psychiatry and Mental Health        |
| Metabolic Brain Disease                                            | Cellular and Molecular Neuroscience |
| Molecular Neurobiology                                             | Cellular and Molecular Neuroscience |
| Molecular Neurodegeneration                                        | Cellular and Molecular Neuroscience |
| Muscle and Nerve                                                   | Cellular and Molecular Neuroscience |
| Nature Human Behaviour                                             | Behavioral Neuroscience             |
| Nature Neuroscience                                                | Neuroscience (miscellaneous)        |
| Nature Reviews Neurology                                           | Cellular and Molecular Neuroscience |
| Nature Reviews Neuroscience                                        | Neuroscience (miscellaneous)        |
| Neural Computation                                                 | Cognitive Neuroscience              |
| Neurobiology of Learning and Memory                                | Cognitive Neuroscience              |
| Neurobiology of Stress                                             | Cellular and Molecular Neuroscience |
| Neurogenesis                                                       | Developmental Neuroscience          |
| NeuroImage                                                         | Cognitive Neuroscience              |
| Neuroinformatics                                                   | Neuroscience (miscellaneous)        |
| NeuroMolecular Medicine                                            | Cellular and Molecular Neuroscience |
| Neuropeptides                                                      | Cellular and Molecular Neuroscience |
| Neurophotonics                                                     | Neuroscience (miscellaneous)        |
| Neuropsychopharmacology                                            | Psychiatry and Mental Health        |
| NeuroReport                                                        | Neuroscience (miscellaneous)        |
| Neuroscience and Behavioral Physiology                             | Neuroscience (miscellaneous)        |
| Neuroscience and Biobehavioral Reviews                             | Cognitive Neuroscience              |
| Neuroscientist                                                     | Neuroscience (miscellaneous)        |



**List of Psychiatry & Neuroscience Journals included in survey mailing (continued)**

| <b>Journal</b>                                         | <b>SCImago Subject Category</b>     |
|--------------------------------------------------------|-------------------------------------|
| Neurotoxicity Research                                 | Neuroscience (miscellaneous)        |
| Personality Disorders: Theory, Research, and Treatment | Psychiatry and Mental Health        |
| Perspectives in Psychiatric Care                       | Psychiatry and Mental Health        |
| PLoS Biology                                           | Neuroscience (miscellaneous)        |
| PLoS Computational Biology                             | Cellular and Molecular Neuroscience |
| Progress in Neurology and Psychiatry                   | Psychiatry and Mental Health        |
| Psychiatric Annals                                     | Psychiatry and Mental Health        |
| Psychiatric Genetics                                   | Psychiatry and Mental Health        |
| Psychiatric Rehabilitation Journal                     | Psychiatry and Mental Health        |
| Psychiatric Services                                   | Psychiatry and Mental Health        |
| Psychiatric Times                                      | Psychiatry and Mental Health        |
| Psychoanalytic Quarterly                               | Psychiatry and Mental Health        |
| Psychosomatic Medicine                                 | Psychiatry and Mental Health        |
| Psychotherapy and Psychosomatics                       | Psychiatry and Mental Health        |
| Review Journal of Autism and Developmental Disorders   | Psychiatry and Mental Health        |
| Schizophrenia Research: Cognition                      | Psychiatry and Mental Health        |
| Stroke                                                 | Neuroscience (miscellaneous)        |
| Synapse                                                | Cellular and Molecular Neuroscience |
| The International Journal of Psychiatry in Medicine    | Psychiatry and Mental Health        |
| The Lancet Psychiatry                                  | Psychiatry and Mental Health        |
| Topics in Cognitive Science                            | Cognitive Neuroscience              |
| Transcultural Psychiatry                               | Psychiatry and Mental Health        |
| Translational Psychiatry                               | Psychiatry and Mental Health        |
| Translational Stroke Research                          | Neuroscience (miscellaneous)        |
| Trends in Cognitive Sciences                           | Cognitive Neuroscience              |
| Trends in Neurosciences                                | Neuroscience (miscellaneous)        |
| Wiley Interdisciplinary Reviews: Cognitive Science     | Neuroscience (miscellaneous)        |
| World Psychiatry                                       | Psychiatry and Mental Health        |



## **Professional Email Lists for Survey Distribution**

American Association for Community Psychiatry (AACP)  
American Association of Directors of Psychiatric Residency Training (AADPRT)  
Association of Directors of Medical Student Education in Psychiatry (ADMSEP)  
American Psychiatric Association Black Caucus  
American Psychiatric Association Asian American Caucus  
American Psychiatric Association Hispanic Caucus  
Society for Research in Psychopathology  
Society for the Science of Clinical Psychology

References: SCImago, (n.d.). SJR — SCImago Journal & Country Rank [Portal]. Retrieved *Date you Retrieve*, from <http://www.scimagojr.com>
